# Supplementary material for: LiNbO3 Thin Films through a Sol–Gel/Spin-Coating Approach Using a Novel Heterobimetallic Lithium–Niobium Precursor
Source: MDPI journal article supplement (doi:10.3390/nano14040345), 2024-02-11
Supplement: s1 [file s1]

# SUPPORTING INFORMATION

## LiNbO<sub>3</sub> Thin Films through a Sol–Gel/Spin-Coating Approach Using a Novel Heterobimetallic Lithium–Niobium Precursor

Francesca Lo Presti <sup>1</sup>, Anna Lucia Pellegrino <sup>1</sup>, Quentin Micard <sup>2</sup>, Guglielmo Guido Condorelli <sup>1</sup>, Samuel Margueron <sup>2</sup>, Ausrine Bartasyte <sup>2,3</sup> and Graziella Malandrino <sup>1,\*</sup>

<sup>1</sup> Dipartimento di Scienze Chimiche, Università degli Studi di Catania, and INSTM UdR Catania, Viale Andrea Doria 6, I-95125 Catania, Italy; francesca.lopresti@unict.it (F.L.P.); annalucia.pellegrino@unict.it (A.L.P.); guido.condorelli@unict.it (G.G.C.)

<sup>2</sup> FEMTO-ST Institute, University of Franche-Comté, ENSMM CNRS UMR 6174, 26 Rue de l'Épitaphe, F-25030 Besançon, France; samuel.margueron@femto-st.fr (S.M.), ausrine.bartasyte@femto-st.fr (A.B.)

<sup>3</sup> Institut Universitaire de France, 1 rue Descartes, F-75231 Paris, France

\* Correspondence: gmalandrino@unict.it; Tel.: +39-095-738-5055

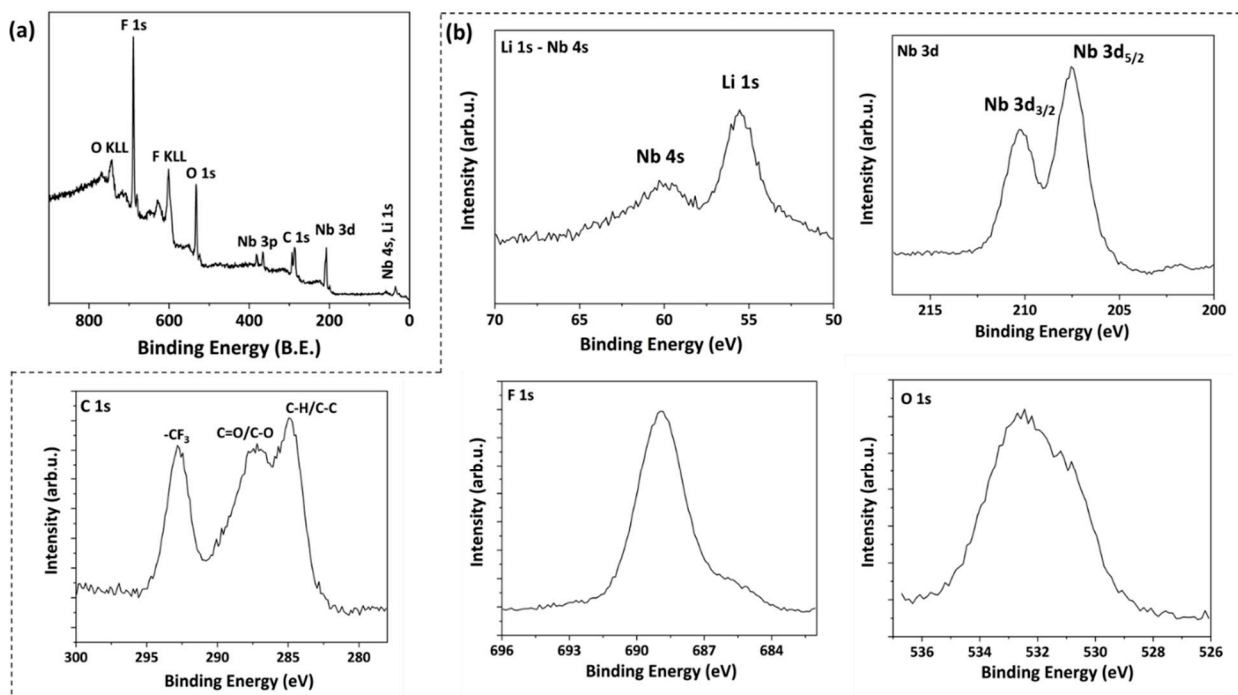

**Figure S1.** XPS survey (a) and binding energy regions (b) of Li 1s, Nb 4s, Nb 3d, C1s, F 1s, and O1s of the “ $\text{Li}_2\text{Nb}(\text{hfa})_7 \cdot \text{diglyme} \cdot x\text{H}_2\text{O}$ ” precursor.

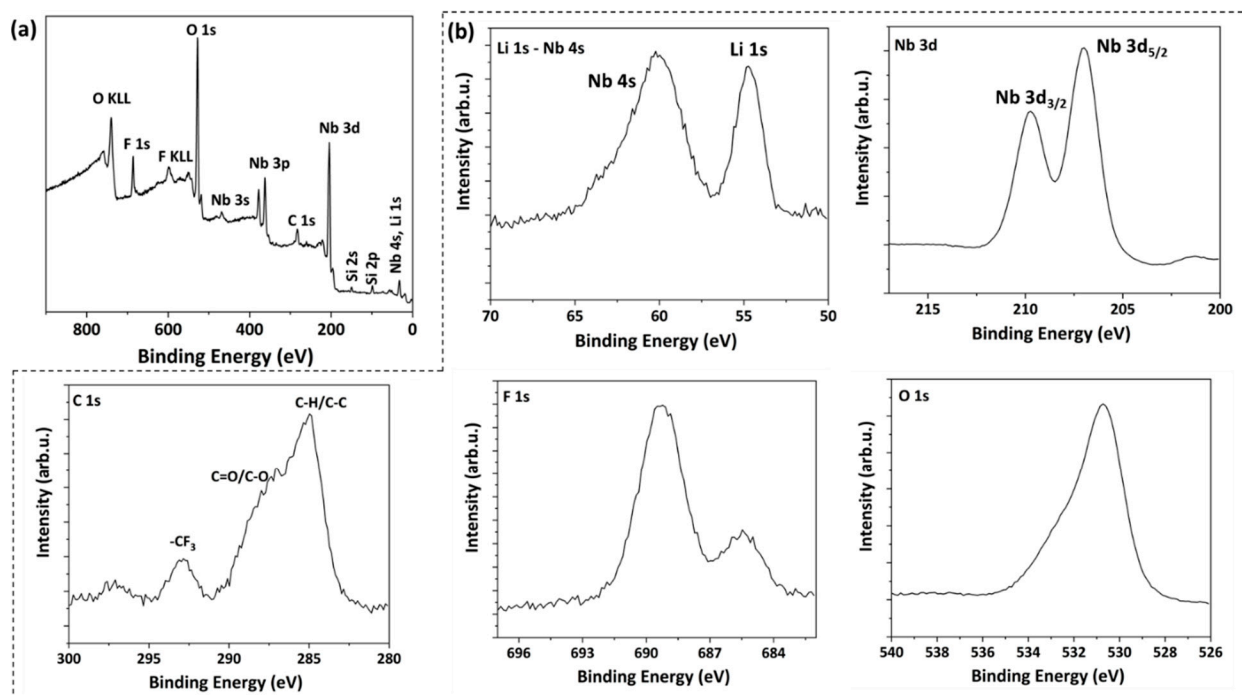

**Figure S2.** XPS survey (a) and binding energy regions (b) of Li 1s, Nb 4s, Nb 3d, C1s, F 1s, and O1s of a LN film annealed at 700°C on Si (100).
